# Supplementary material for: “Call for Prices”: Strategic Implications of Raising Consumers' Costs
Source: Atypon-hosted journal article supplement (doi:10.1287/mksc.1090.0498), 2009-08-15
Supplement: mksc.1090.0498-sm-technicalappendix.pdf [file mksc.1090.0498-sm-technicalappendix.pdf]

## Technical Appendix

Table T1: Optimal Profits of the Two Retailers in Stage 2

| Case | Retailer H                                                                                                                                                                                                                                                                                      |
|------|-------------------------------------------------------------------------------------------------------------------------------------------------------------------------------------------------------------------------------------------------------------------------------------------------|
| YY   | $\Pi_H^{YY*} = \frac{2(225t - 4(7 - 3\delta)^2 \theta^2)(15t(4(1 - 2a)t + 5(V - w))\lambda - 16((1 - 2a)t + (V - w))\theta^2)^2}{(3375t^2 \lambda - 60t\theta^2(16 + (7 - 3\delta)^2 \lambda) + 64(2 - \delta)(7 - 3\delta)\theta^4)^2} - F$                                                    |
| NY   | $\Pi_H^{NY*} = \frac{2(225t - 4(7 - 3\delta)^2 \theta^2)(15t(4(1 - 2a)t + 5(V - w) - 7c)\lambda - 16((1 - 2a)t + (V - w) - 2c)\theta^2)^2}{(3375t^2 \lambda - 60t\theta^2(16 + (7 - 3\delta)^2 \lambda) + 64(2 - \delta)(7 - 3\delta)\theta^4)^2}$                                              |
| YN   | $\Pi_H^{YN*} = \frac{2(225t - 4(7 - 3\delta)^2 \theta^2)(15t(4(1 - 2a)t + 5(V - w) + 2c)\lambda - 16((1 - 2a)t + (V - w) + c)\theta^2)^2}{(3375t^2 \lambda - 60t\theta^2(16 + (7 - 3\delta)^2 \lambda) + 64(2 - \delta)(7 - 3\delta)\theta^4)^2} - F$                                           |
| NN   | $\Pi_H^{NN*} = \frac{2(225t - 4(7 - 3\delta)^2 \theta^2)(15t(4(1 - 2a)t + 5(V - w) - 5c)\lambda - 16((1 - 2a)t + (V - w) - c)\theta^2)^2}{(3375t^2 \lambda - 60t\theta^2(16 + (7 - 3\delta)^2 \lambda) + 64(2 - \delta)(7 - 3\delta)\theta^4)^2}$                                               |
| Case | Retailer L                                                                                                                                                                                                                                                                                      |
| YY   | $\Pi_L^{YY*} = \frac{2\lambda(225t\lambda - 64\theta^2)(15t((1 - 2a)t + 5(V - w)) - 4(7 - 3\delta)(3(V - w) + (1 - 2a)(1 - \delta)t - 2\delta(V - w))\theta^2)^2}{(3375t^2 \lambda - 60t\theta^2(16 + (7 - 3\delta)^2 \lambda) + 64(2 - \delta)(7 - 3\delta)\theta^4)^2} - F$                   |
| NY   | $\Pi_L^{NY*} = \frac{2\lambda(225t\lambda - 64\theta^2)(15t(2c + (1 - 2a)t + 5(V - w)) - 4(7 - 3\delta)(3(V - w) + (1 - 2a)(1 - \delta)t + c\delta - 2\delta(V - w))\theta^2)^2}{(3375t^2 \lambda - 60t\theta^2(16 + (7 - 3\delta)^2 \lambda) + 64(2 - \delta)(7 - 3\delta)\theta^4)^2} - F$    |
| YN   | $\Pi_L^{YN*} = \frac{2\lambda(225t\lambda - 64\theta^2)(15t((1 - 2a)t + 5(V - w) - 7c) - 4(7 - 3\delta)(3(V - w) + (1 - 2a)(1 - \delta)t - c(3 - \delta) - 2\delta(V - w))\theta^2)^2}{(3375t^2 \lambda - 60t\theta^2(16 + (7 - 3\delta)^2 \lambda) + 64(2 - \delta)(7 - 3\delta)\theta^4)^2}$  |
| NN   | $\Pi_L^{NN*} = \frac{2\lambda(225t\lambda - 64\theta^2)(15t((1 - 2a)t + 5(V - w) - 5c) - 4(7 - 3\delta)(3(V - w) + (1 - 2a)(1 - \delta)t - c(3 - 2\delta) - 2\delta(V - w))\theta^2)^2}{(3375t^2 \lambda - 60t\theta^2(16 + (7 - 3\delta)^2 \lambda) + 64(2 - \delta)(7 - 3\delta)\theta^4)^2}$ |

Table T2: Optimal Wholesale Prices and Profits of the Manufacturer

| Case | Wholesale Price                                                                                                                                                                                                                                                                                                                                                                                                   |
|------|-------------------------------------------------------------------------------------------------------------------------------------------------------------------------------------------------------------------------------------------------------------------------------------------------------------------------------------------------------------------------------------------------------------------|
| YY   | $w^{YY*} = \frac{\lambda(75(1-2a)t^2 + 2t(75(V+\kappa) - 2(1-2a)(1-\delta)(7-3\delta)\theta^2) - 4\theta^2(V+\kappa)(21-\delta(23-6\delta))) - 16\theta^2((1-2a)t + V + \kappa)}{4(75t\lambda - 2\theta^2(4 + (3-2\delta)(7-3\delta)\lambda))}$                                                                                                                                                                   |
| NY   | $w^{NY*} = \frac{\lambda(75(1-2a)t^2 + 2t(75(V+\kappa) - 2(1-2a)(1-\delta)(7-3\delta)\theta^2) - 4\theta^2(V+\kappa)(21-\delta(23-6\delta))) - 16\theta^2((1-2a)t + V + \kappa) - c(75t\lambda - 4\theta^2(8-\delta(7-3\delta)\lambda))}{4(75t\lambda - 2\theta^2(4 + (3-2\delta)(7-3\delta)\lambda))}$                                                                                                           |
| YN   | $w^{YN*} = \frac{\lambda(75(1-2a)t^2 + 2t(75(V+\kappa) - 2(1-2a)(1-\delta)(7-3\delta)\theta^2) - 4\theta^2(V+\kappa)(21-\delta(23-6\delta))) - 16\theta^2((1-2a)t + V + \kappa) - c(75t + 16\theta^2 - 4(3-\delta)(7-3\delta)\theta^2)}{4(75t\lambda - 2\theta^2(4 + (3-2\delta)(7-3\delta)\lambda))}$                                                                                                            |
| NN   | $w^{NN*} = \frac{\lambda(75(1-2a)t^2 + 2t(75(V+\kappa) - 2(1-2a)(1-\delta)(7-3\delta)\theta^2) - 4\theta^2(V+\kappa)(21-\delta(23-6\delta))) - 16\theta^2((1-2a)t + V + \kappa) - c(75t\lambda - 2\theta^2(4 + (3-2\delta)(7-3\delta)\lambda))}{4(75t\lambda - 2\theta^2(4 + (3-2\delta)(7-3\delta)\lambda))}$                                                                                                    |
| Case | Manufacturer's Profit                                                                                                                                                                                                                                                                                                                                                                                             |
| YY   | $\Pi_M^{YY*} = \frac{15(\lambda(75(1-2a)t^2 + 2t(75(V-\kappa) - 2(1-2a)(1-\delta)(7-3\delta)\theta^2) - 4\theta^2(V-\kappa)(21-\delta(23-6\delta))) - 16\theta^2((1-2a)t + V - \kappa))^2}{4(3375t^2\lambda - 60t\theta^2(16 + (7-3\delta)^2\lambda) + 64(2-\delta)(7-3\delta)\theta^4)(75t\lambda - 2\theta^2(4 + (3-2\delta)(7-3\delta)\lambda))}$                                                              |
| NY   | $\Pi_M^{NY*} = \frac{15(\lambda(75(1-2a)t^2 + 2t(75(V-\kappa) - 2(1-2a)(1-\delta)(7-3\delta)\theta^2) - 4\theta^2(V-\kappa)(21-\delta(23-6\delta))) - 16\theta^2((1-2a)t + V - \kappa) - c(75t\lambda - 4\theta^2(8-\delta(7-3\delta)\lambda)))^2}{4(3375t^2\lambda - 60t\theta^2(16 + (7-3\delta)^2\lambda) + 64(2-\delta)(7-3\delta)\theta^4)(75t\lambda - 2\theta^2(4 + (3-2\delta)(7-3\delta)\lambda))}$      |
| YN   | $\Pi_M^{YN*} = \frac{15(\lambda(75(1-2a)t^2 + 2t(75(V-\kappa) - 2(1-2a)(1-\delta)(7-3\delta)\theta^2) - 4\theta^2(V-\kappa)(21-\delta(23-6\delta))) - 16\theta^2((1-2a)t + V - \kappa) - c(75t + 16\theta^2 - 4(3-\delta)(7-3\delta)\theta^2))^2}{4(3375t^2\lambda - 60t\theta^2(16 + (7-3\delta)^2\lambda) + 64(2-\delta)(7-3\delta)\theta^4)(75t\lambda - 2\theta^2(4 + (3-2\delta)(7-3\delta)\lambda))}$       |
| NN   | $\Pi_M^{NN*} = \frac{15\lambda(75(1-2a)t^2 + 2t(75(V-\kappa) - 2(1-2a)(1-\delta)(7-3\delta)\theta^2) - 4\theta^2(V-\kappa)(21-\delta(23-6\delta))) - 16\theta^2((1-2a)t + V - \kappa) - c(75t\lambda - 2\theta^2(4 + (3-2\delta)(7-3\delta)\lambda))^2}{4(3375t^2\lambda - 60t\theta^2(16 + (7-3\delta)^2\lambda) + 64(2-\delta)(7-3\delta)\theta^4)(75t\lambda - 2\theta^2(4 + (3-2\delta)(7-3\delta)\lambda))}$ |
